# Supplementary material for: Discovery of associative patterns between workplace sound level and physiological wellbeing using wearable devices and empirical Bayes modeling
Source: PubMed Central journal article supplement (PMC9839735; doi:10.1038/s41746-022-00727-1), 2023-01-13
Supplement: 41746_2022_727_MOESM1_ESM.pdf [file 41746_2022_727_MOESM1_ESM.pdf]

Supplementary Table 1: Literature on effect of workplace sound levels on physiological wellbeing

| Study                             | Input                                                        | Outcome(s)                                                        | Study design                                                                                                                                                                 | Findings                                                                                                                                    |
|-----------------------------------|--------------------------------------------------------------|-------------------------------------------------------------------|------------------------------------------------------------------------------------------------------------------------------------------------------------------------------|---------------------------------------------------------------------------------------------------------------------------------------------|
| Lusk et al., 2002 <sup>1</sup>    | Areas with sound levels averaged across a 5 years interval   | Blood pressure and heart rate                                     | N=374; Correlating person-level noise exposure with physiological wellbeing; Method: Linear regression                                                                       | Areas with high sound levels are predictive of increase in blood pressure                                                                   |
| Lee et al., 2010 <sup>2</sup>     | Discrete sound levels                                        | HRV (LF, LF/HF), Mean blood pressure, Mean heart rate             | N=16; Treatment = Sound level exposure of No noise, 50 dBA, 60 dBA, 70 dBA and 80 dBA for 5 minutes with 2 minutes interval; Method: Repeated measures ANOVA; Spearman's Rho | HRV decreases with higher sound level exposures, but no change in blood pressure and mean heart rate                                        |
| Jahncke et al., 2011 <sup>3</sup> | Noisy background, river sounds, nature movie                 | Cortisol, Catecholamines, self-rating of tiredness, mood          | N=47; Treatment = Completed tasks for 2 hours each in a low and high noise conditions; Repeated measures ANOVA                                                               | Though noisy background and river sounds have an effect on psychological outcomes, they had no significant effect on physiological outcomes |
| Kraus et al., 2013 <sup>4</sup>   | Sound levels                                                 | HRV (LF/HF, SDNN, RMSSD)                                          | N=110; Prospective panel study with participants spending up to 7.5 hours in a room; Method = Additive mixed models                                                          | Sound levels have a positive effect below 65 dBA on SDNN, but is not significantly related to any of the other outcomes                     |
| Sim et al., 2015 <sup>5</sup>     | Sound types, sound levels                                    | HRV (SDNN, HF, LF/HF)                                             | N=40; Treatment: 45 dBA exposure for 5 minutes; Method: Linear regression                                                                                                    | Increase in sound level negatively affects physiological wellbeing. Sound types do not have a significant effect on physiological outcomes  |
| Walker et al., 2016 <sup>6</sup>  | Noise exposure at 75 dBA at low frequency and high-frequency | HRV (SDNN, LF, RMSSD), blood pressure, salivary cortisol, amylase | N=10; Treatment = 40 minutes noise exposure; Method=Multivariate multilevel regression                                                                                       | High sound levels at low-frequencies and high-frequencies have significant negative effect on HRV                                           |

|                                      |                                                                             |                                                                                |                                                                                                                               |                                                                                                                                                                                                      |
|--------------------------------------|-----------------------------------------------------------------------------|--------------------------------------------------------------------------------|-------------------------------------------------------------------------------------------------------------------------------|------------------------------------------------------------------------------------------------------------------------------------------------------------------------------------------------------|
| Park & Lee, 2017 <sup>7</sup>        | Floor impact noises ranging from 31.5 dBA to 63 dBA                         | Noticeability, Annoyance, Heart rate, electrodermal activity, respiration rate | N=21; Treatment = 5 sessions of 15 minutes of different floor impact noises; Method=Repeated measures ANOVA                   | Annoyance, noticeability, electrodermal activity and respiration rate increases with sound level, but no significant change in heart rate. Physiological responses are not affected by noise source. |
| Cvijanović et al., 2017 <sup>8</sup> | Sound levels                                                                | Mental effort, HRV (LF, LF/HF) and skin conductance                            | N=40; Treatment = 6 dBA background noise added while participants completed collaborative tasks; Method=Multilevel regression | Though mental effort required increases with sound levels, effect on physiological wellbeing was not significant                                                                                     |
| Srinivasan et al., 2017 <sup>9</sup> | Sound levels, Temperature, CO <sub>2</sub> , Humidity, Atmospheric pressure | HRV (SDNN, RMSSD, normalized HF, LF/HF)                                        | N=231; Method = Mixed lasso for identify length of cumulative lagged effect of inputs on outcomes                             | Sound level has an instantaneous effect on HRV whereas other environment factors have a lagged effect of one hour                                                                                    |
| Abbasi et al., 2018 <sup>10</sup>    | Low-frequency noise at four different levels                                | Mental fatigue, LF/HF, working memory                                          | N=35; Method = ANOVA for group comparison in a controlled experiment setup                                                    | Mental fatigue caused by low-frequency noise significantly impacted the employees' psycho-physiological and working memory responses                                                                 |

While multiple studies have analyzed the relationship between sound/noise levels in workspace and perceived stress or work performance, fewer studies have examined the physiological implications of workplace sound levels. Table 1 presents a list of studies that have analyzed the relationship between workplace sound levels and physiological wellbeing. The above list does not include studies focusing on psychosocial stress<sup>11</sup>, work performance<sup>12</sup>, mental wellbeing<sup>13</sup>, general workplace environment<sup>14,15</sup>, but only studies which have considered

physiological wellbeing as one of their primary outcomes of interest and workplace sound as the input phenomenon.

Supplementary Table 2: Summary statistics of our data

| <b>Variable</b>                | <b>Summary</b>            |                            |                   |                  |
|--------------------------------|---------------------------|----------------------------|-------------------|------------------|
| <b>INTRAPERSONAL</b>           |                           |                            |                   |                  |
| <b>Numerical</b>               | <b>Mean</b>               | <b>SD</b>                  | <b>Units</b>      | <b>% missing</b> |
| <i>SDNN</i>                    | 53.08                     | 23.33                      | ms                | -                |
| <i>Normalized-HF</i>           | 19.81                     | 12.70                      | %                 | -                |
| <i>Sound level</i>             | 51.85                     | 8.79                       | dBA               | 4.29             |
| <i>Physical activity level</i> | 0.1738                    | 0.3164                     | G                 | 0.07             |
| <b>Categorical</b>             | <b>Category</b>           | <b>Hours:Mins</b>          | <b>Proportion</b> | <b>% missing</b> |
| <i>Time of day</i>             |                           |                            |                   | 0.00             |
|                                | <i>Morning</i>            | 1224:10                    | 45.76             |                  |
|                                | <i>Afternoon</i>          | 1039:30                    | 38.85             |                  |
|                                | <i>Evening</i>            | 411:15                     | 15.37             |                  |
| <i>Day of week</i>             |                           |                            |                   | 0.00             |
|                                | <i>Monday</i>             | 449:25                     | 16.80             |                  |
|                                | <i>Tuesday</i>            | 860:50                     | 32.18             |                  |
|                                | <i>Wednesday</i>          | 916:55                     | 34.28             |                  |
|                                | <i>Thursday</i>           | 431:50                     | 16.14             |                  |
|                                | <i>Friday</i>             | 15:45                      | 0.59              |                  |
| <b>INTERPERSONAL</b>           |                           |                            |                   |                  |
| <b>Numerical</b>               | <b>Mean</b>               | <b>SD</b>                  | <b>Units</b>      | <b>% missing</b> |
| <i>Neuroticism</i>             | 3.21                      | 0.97                       | Scale 1-7         | 10.38            |
| <i>Noise sensitivity</i>       | 4.05                      | 1.17                       | Scale 1-7         | 9.52             |
| <i>Average sound exposure</i>  | 51.99                     | 4.89                       | dBA               | 4.33             |
| <b>Categorical</b>             | <b>Category</b>           | <b>No. of participants</b> | <b>Proportion</b> | <b>% missing</b> |
| <i>Age</i>                     |                           |                            |                   | 9.95             |
|                                | <i>Less than 30 years</i> | 30                         | 12.98             |                  |
|                                | <i>30 - 39 years</i>      | 62                         | 26.83             |                  |
|                                | <i>40 - 49 years</i>      | 43                         | 18.61             |                  |
|                                | <i>50 - 59 years</i>      | 56                         | 24.24             |                  |
|                                | <i>60 years or above</i>  | 17                         | 7.36              |                  |
| <i>Gender</i>                  |                           |                            |                   | 12.12            |
|                                | <i>Male</i>               | 88                         | 38.09             |                  |

|                               |                   |     |       |       |
|-------------------------------|-------------------|-----|-------|-------|
|                               | <i>Female</i>     | 115 | 49.78 |       |
| <i>BMI</i>                    |                   |     |       | 10.39 |
|                               | <i>18.5 - 25</i>  | 76  | 32.9  |       |
|                               | <i>25.1 - 30</i>  | 81  | 35.06 |       |
|                               | <i>30.1 - 35</i>  | 30  | 12.98 |       |
|                               | <i>Above 35.1</i> | 20  | 8.66  |       |
| <i>Computer-dominant work</i> |                   |     |       | 8.66  |
|                               | <i>Yes</i>        | 93  | 40.26 |       |
|                               | <i>No</i>         | 118 | 51.08 |       |
| <i>Management work</i>        |                   |     |       | 8.66  |
|                               | <i>Yes</i>        | 69  | 29.87 |       |
|                               | <i>No</i>         | 142 | 61.47 |       |
| <i>Technical work</i>         |                   |     |       | 8.66  |
|                               | <i>Yes</i>        | 90  | 38.96 |       |
|                               | <i>No</i>         | 121 | 52.38 |       |
| <i>Meeting heavy work</i>     |                   |     |       | 8.66  |
|                               | <i>Yes</i>        | 42  | 18.18 |       |
|                               | <i>No</i>         | 169 | 73.16 |       |
| <i>Sleep problems</i>         |                   |     |       | 9.09  |
|                               | <i>Yes</i>        | 42  | 18.18 |       |
|                               | <i>No</i>         | 168 | 72.73 |       |
| <i>High blood pressure</i>    |                   |     |       | 9.09  |
|                               | <i>Yes</i>        | 42  | 18.18 |       |
|                               | <i>No</i>         | 168 | 72.73 |       |
| <i>Anxiety</i>                |                   |     |       | 9.09  |
|                               | <i>Yes</i>        | 38  | 16.45 |       |
|                               | <i>No</i>         | 172 | 74.46 |       |

Table 2 shows the summary statistics of relevant intrapersonal variables (i.e., wearable device based repeated measures and temporal information) and interpersonal variables (i.e., person-level information) in this study.

## References

1. Lusk, S. L., Hagerty, B. M., Gillespie, B. & Caruso, C. C. Chronic Effects of Workplace Noise on Blood Pressure and Heart Rate. *Archives of Environmental Health* **57**, 273–281 (2002).
2. Lee, G.-S., Chen, M.-L. & Wang, G.-Y. Evoked response of heart rate variability using short-duration white noise. *Autonomic neuroscience: Basic & Clinical* vol. 155 94–97 Preprint at <https://doi.org/10.1016/j.autneu.2009.12.008> (2010).
3. Jahncke, H., Hygge, S., Halin, N., Green, A. M. & Dimberg, K. Open-plan office noise: Cognitive performance and restoration. *Journal of Environmental Psychology* **31**, 373–382 (2011).
4. Kraus, U. *et al.* Individual daytime noise exposure during routine activities and heart rate variability in adults: a repeated measures study. *Environ Health Perspect* **121**, 607–612 (2013).
5. Sim, C. S. *et al.* The effects of different noise types on heart rate variability in men. *Yonsei Medical Journal* **56**, 235–243 (2015).
6. Walker, E. D., Brammer, A., Cherniack, M. G., Laden, F. & Cavallari, J. M. Cardiovascular and stress responses to short-term noise exposures—A panel study in healthy males. *Environmental Research* **150**, 391–397 (2016).
7. Park, S. H. & Lee, P. J. Effects of floor impact noise on psychophysiological responses. *Building and Environment* **116**, 173–181 (2017).
8. Cvijanović, N., Kechichian, P., Janse, K. & Kohlrausch, A. Effects of noise on arousal in a speech communication setting. *Speech Communication* **88**, 127–136 (2017).
9. Srinivasan, K. *et al.* A Regularization Approach for Identifying Cumulative Lagged Effects in Smart Health Applications. in *Proceedings of the 7th International Conference on Digital Health* 99–103 (ACM Press, 2017).
10. Abbasi, A. M., Motamedzade, M., Aliabadi, M., Golmohammadi, R. & Tapak, L. Study of the physiological and mental health effects caused by exposure to low-frequency noise in a simulated control room. *Building Acoustics* **25**, (2018).
11. Leather, P., Beale, D. & Sullivan, L. Noise, psychosocial stress and their interaction in the workplace. *Journal of Environmental Psychology* **23**, (2003).
12. Nielsen, K. *et al.* Workplace resources to improve both employee well-being and performance: A systematic review and meta-analysis. *Work and Stress* Preprint at <https://doi.org/10.1080/02678373.2017.1304463> (2017).
13. Goh, J., Pfeffer, J. & Zenios, S. A. The relationship between workplace stressors and mortality and health costs in the United State. *Management Science* (2016).
14. Thayer, J. F. *et al.* Effects of the physical work environment on physiological measures of stress. *European journal of cardiovascular prevention and rehabilitation* **17**, 431–9 (2010).
15. Colenberg, S., Jylhä, T. & Arkesteijn, M. The relationship between interior office space and employee health and well-being—a literature review. *Building Research and Information* **49**, (2021).
